# Supplementary material for: Rumen Fermentation Characteristics Require More Time to Stabilize When Diet Shifts
Source: Animals (Basel). 2021 Jul 23;11(8):2192. doi: 10.3390/ani11082192 (PMC8388484; doi:10.3390/ani11082192)
Supplement: Supplementary file 1 [file animals-11-02192-s001.zip › animals-1255477-supplementary.pdf]

**Table S1.** Growth performance of steers over three collection periods in high- and low-density diets.

| Item                               | H diet <sup>1</sup> |         |        | L diet <sup>2</sup> |         |         | SEM <sup>3</sup> | <i>p</i> – value <sup>4</sup> |            |       |
|------------------------------------|---------------------|---------|--------|---------------------|---------|---------|------------------|-------------------------------|------------|-------|
|                                    | HP1                 | HP2     | HP3    | LP1                 | LP2     | LP3     |                  | Diet (D)                      | Period (P) | D × P |
| Initial body weight, kg            |                     | 466.3   |        |                     | 466.9   |         | 14.37            |                               | 0.978      |       |
| Final body weight, kg              | 508.6               | 534.6   | 571.4  | 496.2               | 519.1   | 552.5   | 14.14            | 0.450                         | <0.001     | 0.305 |
| Feed intake, kg/d                  | 11.11ab             | 11.22ab | 11.48a | 10.11b              | 10.40ab | 11.05ab | 0.29             | 0.098                         | <0.001     | 0.001 |
| Energy intake, Mcal/d              | 28.11a              | 28.39a  | 29.04a | 23.77b              | 24.44b  | 25.96ab | 0.72             | 0.004                         | <0.001     | 0.003 |
| Protein intake, kg/d               | 1.32a               | 1.34a   | 1.37a  | 1.06b               | 1.09b   | 1.16b   | 0.03             | <0.001                        | <0.001     | 0.004 |
| Average daily gain, g/d            | 1409                | 865     | 1228   | 976                 | 763     | 1114    | 87.85            | 0.049                         | 0.002      | 0.101 |
| Feed conversion ratio <sup>5</sup> | 8.30                | 13.42   | 9.50   | 10.89               | 14.26   | 10.14   | 0.96             | 0.237                         | 0.001      | 0.378 |

Notes: <sup>1</sup> H = high-density diet, HP1 = samples of the first month of H diet, HP2 = samples of the second month of H diet, HP3 = samples of the third month of H diet. <sup>2</sup> L = low-density diet, LP1 = samples of the first month of L diet, LP2 = samples of the second month of L diet, LP3 = samples of the third month of L diet. <sup>3</sup> SEM = standard error of means. <sup>4</sup> D × P indicates interaction effects between dietary density and collection period. <sup>5</sup> Feed conversion ratio was calculated as: feed intake (kg/d)/average daily gain (kg/d). a–b: different superscripts indicate significant differences within a row ( $p < 0.05$ ).
